# Supplementary material for: Cloning, overexpression and biocatalytic exploration of a novel Baeyer-Villiger monooxygenase from Aspergillus fumigatus Af293
Source: PubMed Central journal article supplement (PMC3762062; doi:10.1186/2191-0855-3-33), 2013-06-14

**CLONING, OVEREXPRESSION AND BIOCATALYTIC EXPLORATION OF A NOVEL  
BAEYER-VILLIGER MONOOXYGENASE FROM *ASPERGILLUS FUMIGATUS* AF293**

Maria Laura Mascotti<sup>1</sup>, Maximiliano Juri Ayub<sup>2</sup>, Hanna Dudek<sup>3</sup>, Marcela Kurina Sanz<sup>\*1</sup>, Marco W. Fraaije<sup>\*\*3</sup>

<sup>1</sup> INTEQUI-CONICET, Facultad de Química Bioquímica y Farmacia, Universidad Nacional de San Luis, CP 5700, San Luis, Argentina

<sup>2</sup> IMIBIO-CONICET, Facultad de Química Bioquímica y Farmacia, Universidad Nacional de San Luis, CP 5700, San Luis, Argentina

<sup>3</sup> Laboratory of Biochemistry, Groningen Biomolecular Sciences and Biotechnology Institute, University of Groningen, Nijenborgh 4, 9747 AG, Groningen, The Netherlands.

Corresponding authors:

\*Marcela Kurina-Sanz

E-mail: marcelakurina@gmail.com; Tel: +54-0266-4439909

\*\*Marco W. Fraaije

E-mail: m.w.fraaije@rug.nl; Tel: +31 50-363-4345

**Electronic Supplementary Material**

Contents

1. PCR protocols: Primers & Vectors
2. Expression conditions
3. Expression of BVMO<sub>Af1</sub>
4. Substrates screening
5. GC analyses
6. *Aspergillus fumigatus* Af293 BVMO encoding genes

1. PCR protocols: Primers & Vectors

**Table S1**

Cloned genes, expression vectors and primers used for genomic DNA amplification. Restriction sites are underlined

| <b>Gene</b>          | <b>Size</b> | <b>Vector</b> | <b>Oligonucleotides 5'→3'</b>                                                                                |
|----------------------|-------------|---------------|--------------------------------------------------------------------------------------------------------------|
| <i>Af1</i>           | 2718        | pET200        | Fw: CACCATGACCAGAATACGTCCAGAC<br>Rev_EcoRI: <u>CGGAATTCT</u> CAATGCCATTAGTAGTAACGG                           |
| <i>Af1 truncated</i> | 1614        | pCRE2         | Fw: ACTCGAGATCTGCAGCTGGTATGACCAGAATACGTCCAG<br>Rev: GTTCGGGCCCAAGCTTTAACGTGTAAAGCTCATA                       |
| <i>Af2</i>           | 1461        | pET200        | Fw_Nde I: <u>CACCCATATG</u> GATTACGATATTATCATTGTTGG<br>Rev_Hind III: GCG <u>AAGCTT</u> CTATTGCTGCTTCTTCCAGCC |
|                      |             | pCRE2         | Fw: ACTCGAGATCTGCAGCTGGTATGGATTACGATATTATCA<br>Rev: GTTCGGGCCCAAGCTTTATTGCTGCTTCTTCCAG                       |
| <i>Af3</i>           | 1806        | pET200        | Fw_Nde I: <u>CACCCATATG</u> CGTTGCATACCCTGCC<br>Rev_Eco RI: GCG <u>AATTCT</u> TATAGAAGCGGCCGCGGC             |
| <i>Af3 truncated</i> | 1632        | pCRE2         | Fw: ACTCGAGATCTGCAGCTGGTATGTCAGAACACTACCTCG<br>Rev: GTTCGGGCCCAAGCTTTATAGAAGCGGCCGCGGC                       |

2. Expression conditions

**Table S2**

All the expression conditions assayed are listed below

| <i>Vector</i>                    | <i>Cells</i> | <i>Growing T<sup>a</sup></i>      | <i>Inductor</i>         | <i>Induction T</i>           | <i>Induction time</i>        |
|----------------------------------|--------------|-----------------------------------|-------------------------|------------------------------|------------------------------|
| pET-Af1<br>pET-Af2<br>pET-Af3    | BL21         | 37 °C<br>(OD <sub>600</sub> =0.5) | IPTG<br>0.5 mM          | 17°C<br>24°C<br>30°C<br>37°C | 6 h                          |
| pET-Af1<br>pET-Af2<br>pET-Af3    | BL21         | 37 °C<br>(OD <sub>600</sub> =0.5) | IPTG<br>1 mM            | 17°C<br>24°C<br>30°C<br>37°C | 6 h                          |
| pCRE-Af1<br>pCRE-Af2<br>pCRE-Af3 | TOP 10       | -                                 | Arabinose<br>0.002% w/v | 17°C<br>24°C<br>30°C<br>37°C | 48 h<br>36 h<br>24 h<br>12 h |
| pCRE-Af1<br>pCRE-Af2<br>pCRE-Af3 | TOP 10       | -                                 | Arabinose<br>0.02% w/v  | 17°C<br>24°C<br>30°C<br>37°C | 48 h<br>36 h<br>24 h<br>12 h |
| pCRE-Af1<br>pCRE-Af2<br>pCRE-Af3 | TOP 10       | -                                 | Arabinose<br>0.2% w/v   | 17°C<br>24°C<br>30°C<br>37°C | 48 h<br>36 h<br>24 h<br>12 h |

<sup>a</sup> For pCRE2 based constructs, no pre-culture is needed, growing is directly in the presence of inducer

3. Expression of BVMO<sub>Af1</sub>

**Figure S1**

SDS-PAGE analyses for BVMO<sub>Af1</sub> purification fractions. *lane 1*: crude extract, *lane 2*: flow through, *lanes 3, 4, and 5*: sequential washes with imidazole increasing concentrations, *lane 6*: yellow, active fraction. The arrow refers to purified BVMO<sub>Af1</sub>

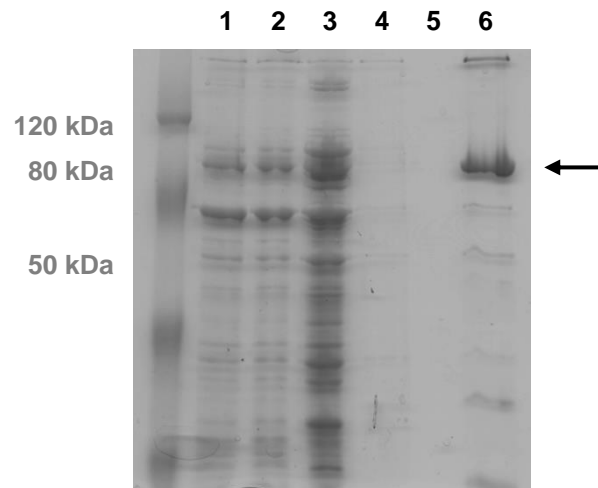

#### 4. Substrates screening

**Table S3**

BVMO<sub>Af1</sub> substrates profile

| <i>Entry</i> | <i>Substrate</i>              | <i>BVMO<sub>Af1</sub><sup>a</sup></i> |
|--------------|-------------------------------|---------------------------------------|
| 1            | 2-propanone                   |                                       |
| 2            | 2-butanone                    |                                       |
| 3            | 3-buten-2-one                 |                                       |
| 4            | 2-octanone                    |                                       |
| 5            | 3-octanone                    |                                       |
| 6            | 4-octanone                    |                                       |
| 7            | 2-decanone                    |                                       |
| 8            | butyl levulinate              |                                       |
| 9            | 3-methyl-2,4-pentanedione     |                                       |
| 10           | cyclobutanone                 |                                       |
| 11           | cyclopentanone                |                                       |
| 12           | cyclohexanone                 |                                       |
| 13           | cyclopentadecanone            |                                       |
| 14           | 2-oxocyclohexanecarbonitrile  | ++                                    |
| 15           | 4-methyl cyclohexanone        |                                       |
| 16           | 2-propyl cyclohexanone        |                                       |
| 17           | dehydrocarvone                |                                       |
| 18           | cyclopropyl methyl ketone     |                                       |
| 19           | norcamphor                    |                                       |
| 20           | bicyclo[3.2.0]hept-2-en-6-one | +++                                   |
| 21           | progesterone                  |                                       |
| 22           | androstenedione               |                                       |
| 23           | 4-dimethylamino benzaldehyde  |                                       |
| 24           | nicotine                      |                                       |
| 25           | thioanisole                   | +                                     |

|    |                                |     |
|----|--------------------------------|-----|
| 26 | benzyl ethyl sulfide           | +++ |
| 27 | benzyl phenyl sulfide          | +   |
| 28 | ethionamide                    | +   |
| 29 | diphenylmethylthioacetamide    |     |
| 30 | thiacetazone                   |     |
| 31 | indole                         |     |
| 32 | 3-acetyl indole                |     |
| 33 | 5-methyl furfural              |     |
| 34 | benzaldehyde                   |     |
| 35 | acetophenone                   |     |
| 36 | 4-hydroxyacetophenone          |     |
| 37 | 2,6-dihydroxy acetophenone     |     |
| 38 | 3-phenylpentane-2,4-dione      | +++ |
| 39 | phenylacetone                  |     |
| 40 | 4-(4-hydroxyphenyl)-2-butanone |     |
| 41 | 2-phenyl cyclohexanone         |     |
| 42 | benzoin                        |     |
| 43 | phenindione                    |     |
| 44 | 2-indanone                     |     |
| 45 | 1-indanone                     |     |

<sup>a</sup> Activity was measured employing a colorimetric (phosphate- based detection) screening assay, previously reported for BVMOs substrate screening (Riebel et al. 2012). The activity is indicated as +, ++ or +++ representing 1.2-, 2- or 5-fold phosphate formation (substrate conversion) respectively, when comparing with the blanks

## 5. GC analyses

The following columns were used for the determination of conversions and enantiomeric excesses: Column A: Alltech GT-A (30 m x 0.25 mm x 0.25  $\mu$ m, 12.2 psi N<sub>2</sub>); column B: Hewlett Packard HP-1 (30m x 0.32 mm x 0.25 $\mu$ m, 12.2 psi N<sub>2</sub>) and C: Chirasil Dex CB (30 m x 0.25 mm x 0.25  $\mu$ m, 12 psi N<sub>2</sub>). For all the analyses, the injector temperature was 200°C and the FID temperature was 250°C

**Table S4**

GC employed conditions and retention times ( $t_R$ ) of substrates and products

| <i>compound</i> | <i>program</i> <sup>a</sup> | <i>column</i> | <i>t<sub>R</sub> (min) substrates</i> | <i>t<sub>R</sub> (min) products</i>     |
|-----------------|-----------------------------|---------------|---------------------------------------|-----------------------------------------|
|                 |                             |               |                                       | 16.5 Abnormal (1 <i>R</i> ,5 <i>S</i> ) |
| <b>1</b>        | 130°C isotherm              | C             | 9 (1 <i>S</i> ,5 <i>R</i> )           | 16.9 Normal (1 <i>R</i> ,5 <i>S</i> )   |
|                 |                             |               | 9.2 (1 <i>R</i> ,5 <i>S</i> )         | 17.2 Abnormal (1 <i>S</i> ,5 <i>R</i> ) |
|                 |                             |               |                                       | 17.4 Normal (1 <i>S</i> ,5 <i>R</i> )   |
|                 |                             |               |                                       | 13.4 sulfoxide                          |
| <b>2</b>        | 70/0/5/200/0                | B             | 9.63                                  | 14.2 sulfone                            |
|                 |                             |               |                                       |                                         |
|                 | 100/0/10/160/8              | A             | 6.9                                   | 14.9 ( <i>S</i> )                       |
| <b>3</b>        | 70/5/5/200/5                | B             | 12.5                                  | 16.5 sulfoxide                          |
|                 |                             |               |                                       |                                         |
|                 | 40/0/10/160/8               | A             | 8.8                                   | 14.4 ( <i>R</i> )<br>15.5 ( <i>S</i> )  |

<sup>a</sup> Program: initial T (°C)/ time (min)/ slope (°C/min)/T (°C)/ time (min)/ slope (°C/min)/T (°C)/ time (min).

Bicyclo[3.2.0]hepten-2-one (**1**), thioanisol (**2**), benzyl ethyl sulfide (**3**)

## 6. *Aspergillus fumigatus* Af293 BVMO encoding genes

**Figure S2**

Multiple sequence alignment of *A. fumigatus* Af293 BVMOs sequences. Sequences are:

BVMO<sub>Af1</sub> (XP\_747160), BVMO<sub>Af2</sub> (XP\_746949), BVMO<sub>Af3</sub> (XP\_755274), XP\_751302, XP\_747774, XP\_754119, XP\_752204, XP\_756084 from *A. fumigatus* Af293, PAMO (YP\_289549) from *Thermobifida fusca*, CHMO (AAG10021) from *Acinetobacter sp.*, and CAMO (AET80001.1) from *Cylindrocarpum radiclecola*. The two Rossmann folds (GxGxxG) and the BVMO fingerprint (FxGxxxHxxxWP/D) are in bolds

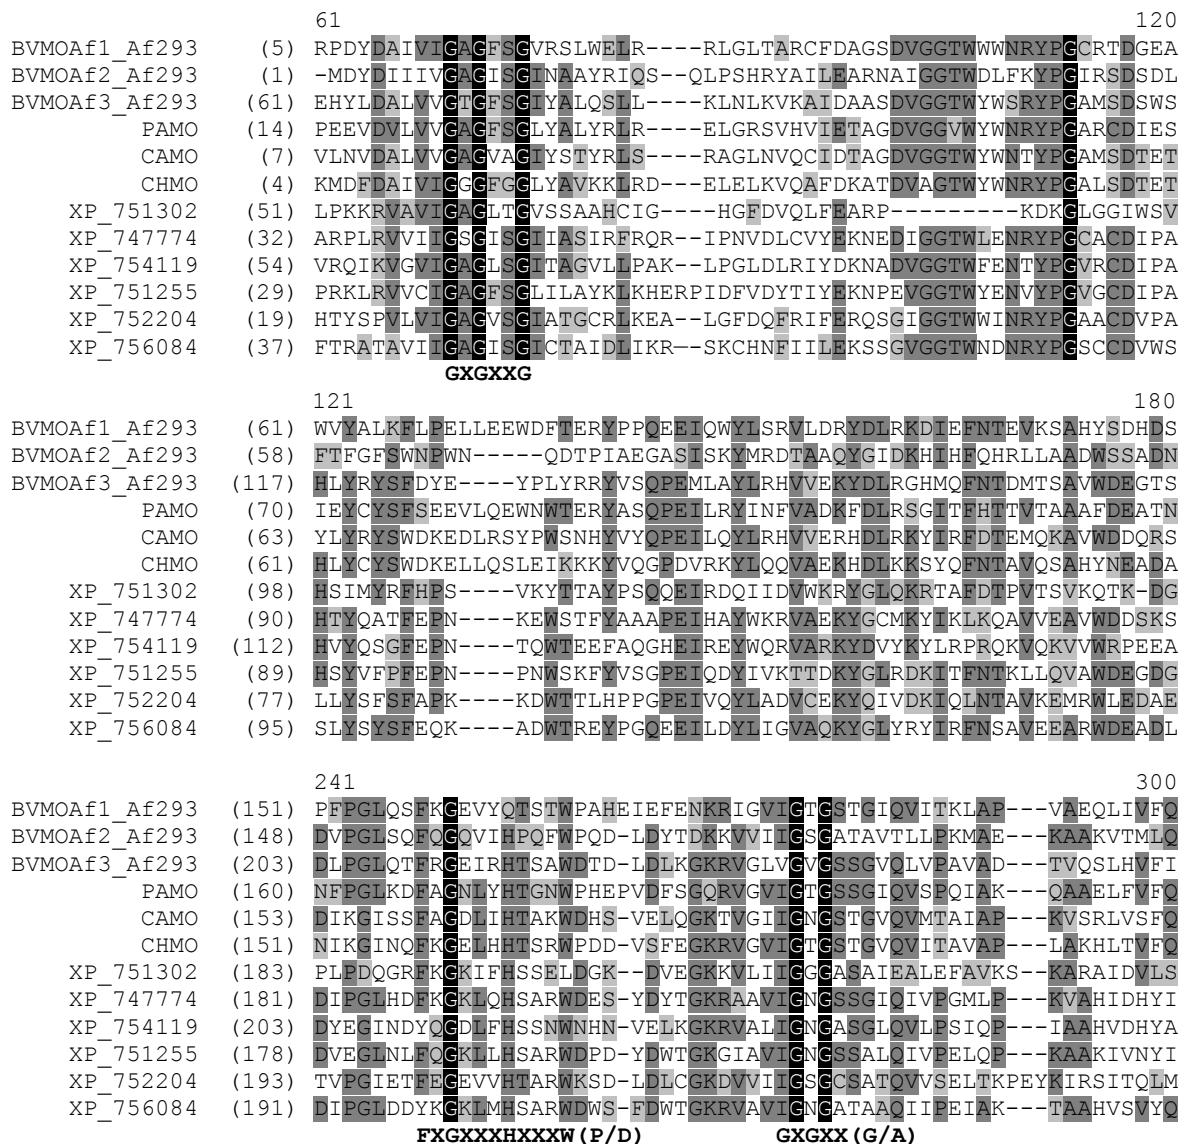

Supplement: 2191-0855-3-33-S1.pdf [file 2191-0855-3-33-S1.pdf]
